# Supplementary material
Source: publisher site journal article supplement (https://www.dovepress.com/article/363508)
Supplement: Supplementary file 1 [file get_supplementary_file.php]

**Supplemental Table 1. Primers for Genomic PCR**

| genes | primer sequence (5' to 3’) |
| --- | --- |
| *TP53* | F: cttaggctccagaaaggacaag |
|  | R: agaggcaaggaaaggtgataaa |
| *FLT3* | F: gcgcataacatgtgcatctac |
|  | R: GTGGAGGGATGAAGTCCTTAAA |
| *SETBP1* | F: tttctctctctctgtctctctcc |
|  | R: CCTTTGTACCTCCTCCATCTTG |
| *JAK3* | F: CTGTGTTAAGCCTGGAGAgtaag |
|  | R: CCACTAAACACTTCCCAGACC |
